# Supplementary material for: Human USP18 deficiency underlies type 1 interferonopathy leading to severe pseudo-TORCH syndrome
Source: PubMed Central journal article supplement — J Exp Med. 2016 Jun 27;213(7):1163–74. doi: 10.1084/jem.20151529 (PMC4925017; doi:10.1084/jem.20151529), 2016-06-27
Supplement: supp_jem.20151529_JEM_20151529_sm.pdf [file supp_jem.20151529_JEM_20151529_sm.pdf]

## SUPPLEMENTAL MATERIAL

Meuwissen et al., <http://www.jem.org/cgi/content/full/jem.20151529/DC1>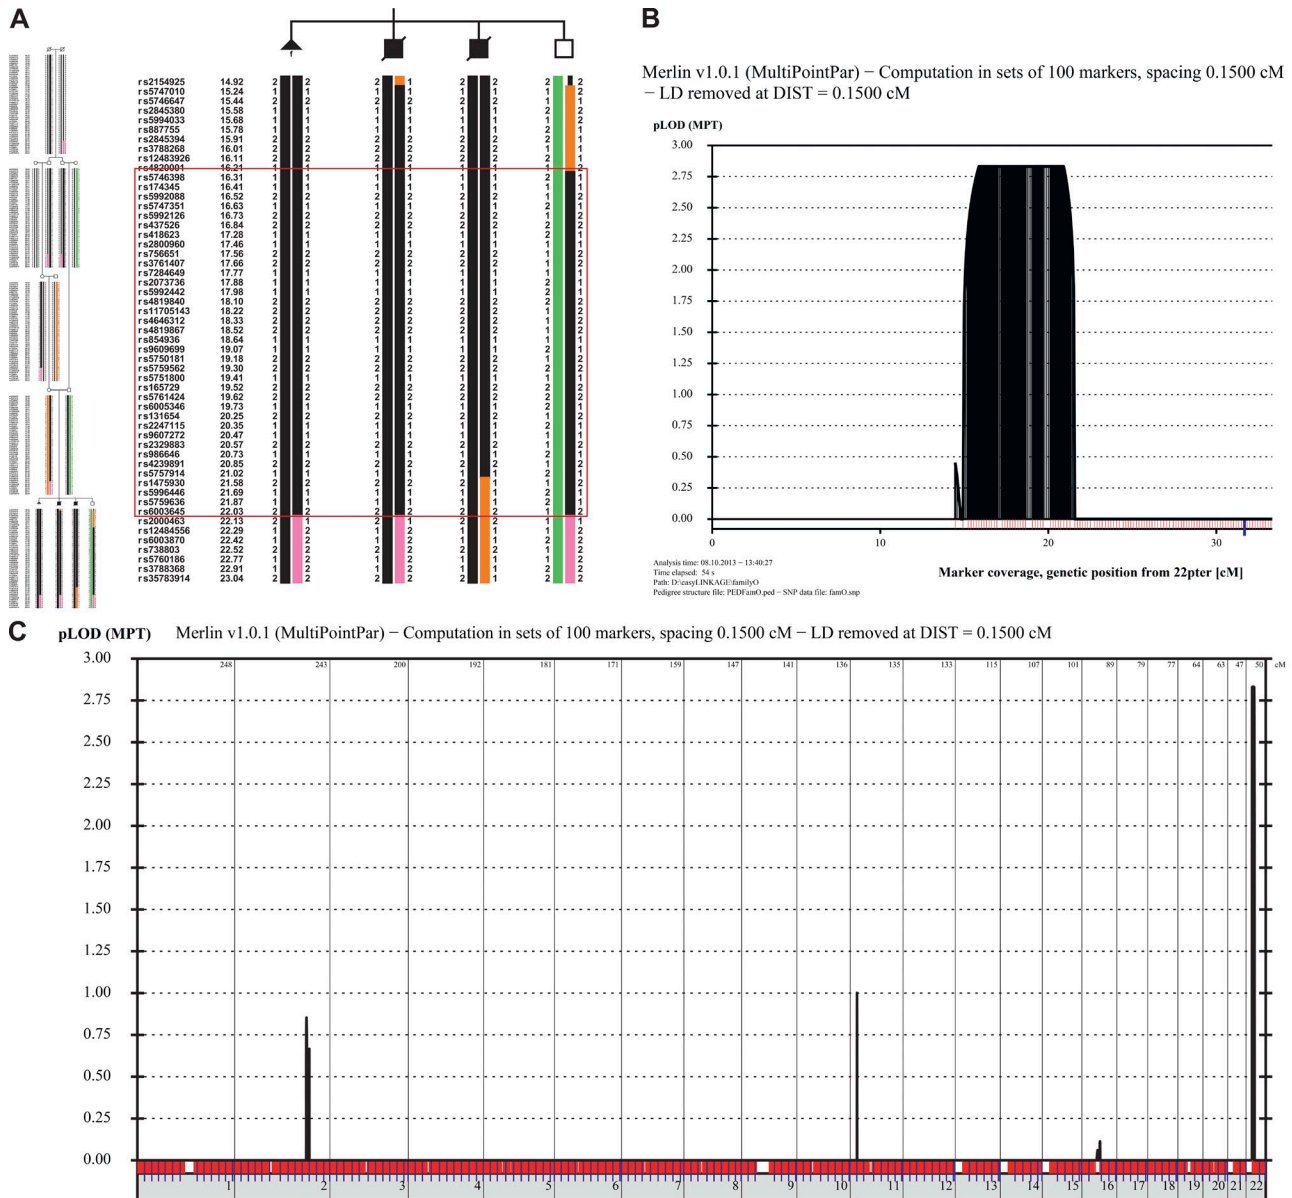

Figure S1. **Linkage data and haplotyping.** (A) Haplotype analysis of family A; the haplotype shared by the affected individuals is located in the red box (A, part of it is included in Fig. 2 A). (B) The linked area on chromosome 22 with a LOD score of 2.83. (C) Genome-wide linkage, confirming that the linked area on chromosome 22 is the only linkage area with a significant LOD score.

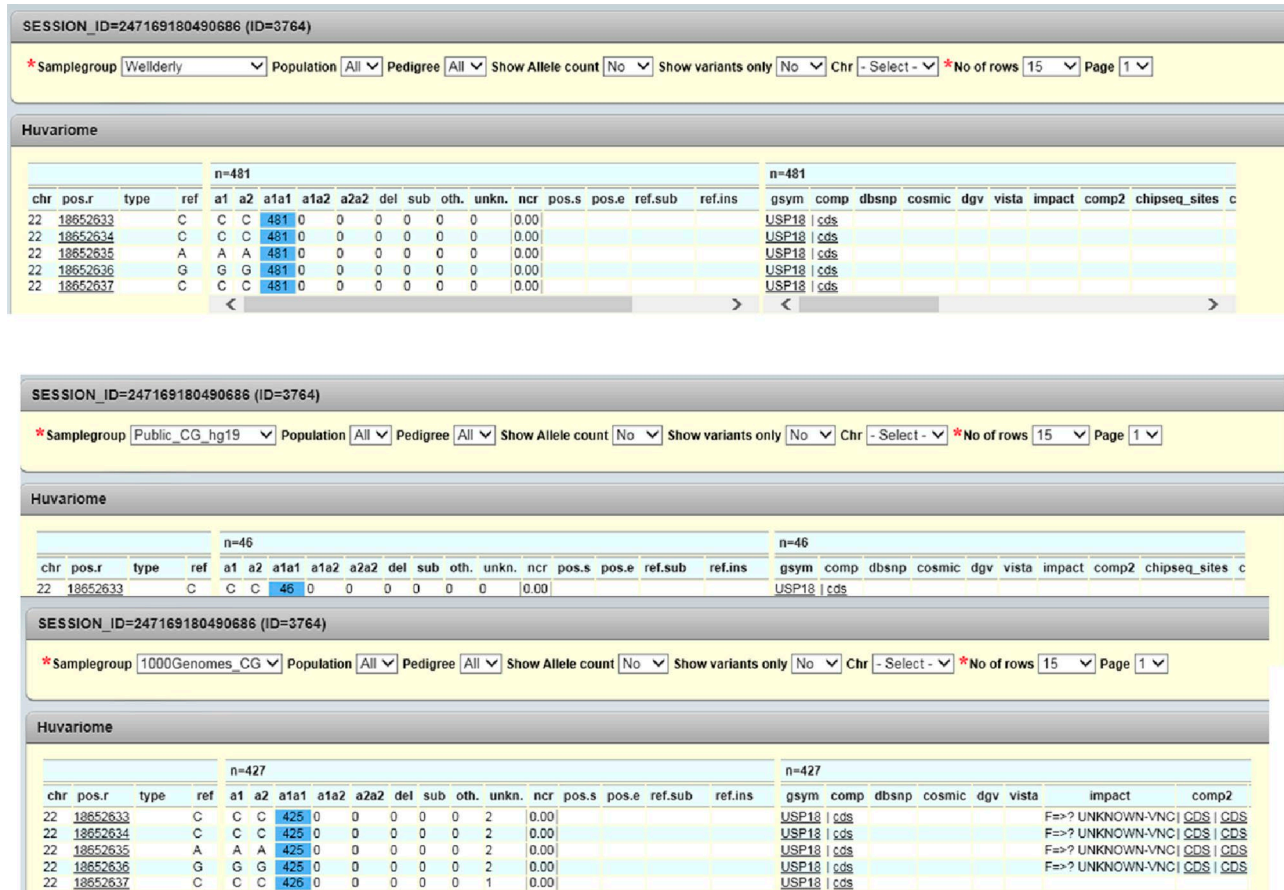

Figure S2. **Complete Genomics control alleles.** Analysis of 952 DNA samples sequenced by CG (whole genome sequencing, containing 481 samples of Welllderly-aged Americans cohort, 46 public CG data from in-house database of the Erasmus Medical Center, and 425 samples from the 1,000 genomes project), which provide full coverage of USP18 shows no c.652C>T variant.

Sequence ID: [reflXM\\_003960815.2](#) Length: 1082 Number of Matches: 1

| Range 1: 3 to 921 |        | <a href="#">GenBank</a>                                      | <a href="#">Graphics</a> | <a href="#">Next Match</a> | <a href="#">Previous Match</a> |
|-------------------|--------|--------------------------------------------------------------|--------------------------|----------------------------|--------------------------------|
| Score             | Expect | Identities                                                   | Gaps                     | Strand                     |                                |
| 1631 bits(883)    | 0.0    | 907/919(99%)                                                 | 0/919(0%)                | Plus/Plus                  |                                |
| Query             | 587    | GGCCTGGTTGGTTTACACAACATTGGACAGACCTGCTGCCTTAACCTTGGATTTCAGGTG |                          |                            | 646                            |
| Sbjct             | 3      | GGCCTGGTTGGTTTACACAACATTGGACAGACCTGCTGCCTTAACCTTGGATTTCAGGTG |                          |                            | 62                             |
| Query             | 647    | TTCGTAATGAATGTGGACTTCACCAGGATATTGAAGAGGATCACGGTGCCAGGGGAGCT  |                          |                            | 706                            |
| Sbjct             | 63     | TTTGTAAATGAATGTGGACTTCACCAGGATATTGAAGAGGATCACGGTGCCAGGGGAGCT |                          |                            | 122                            |
| Query             | 707    | GACGAGCAGAGGAGAAGCGTCCCTTCCAGATGCTTCTGCTGCTGGAGAAGATGCAGGAC  |                          |                            | 766                            |
| Sbjct             | 123    | GACGAGCAGAGGAGAAGCGTCCCTTCCAGATGCTTCTGCTGCTGGAGAAGATGCAGGAC  |                          |                            | 182                            |
| Query             | 767    | AGCCGGCAGAAAGCAGTGCAGCCCTGGAGCTGGCCTACTGCCTGCAGAAGTACAACGTC  |                          |                            | 826                            |
| Sbjct             | 183    | AGCCGGCAGAAAGCAGTGCAGCCCTGGAGCTGGCCTACTGCCTGCAGAAGTACAACGTC  |                          |                            | 242                            |
| Query             | 827    | CCCTTGTTTGTCCAACATGATGCTGCCCAACTGTACCTCAAACCTTGGAACCTGATTAAG |                          |                            | 886                            |
| Sbjct             | 243    | CCCCTGTTTGTCCAACATGATGCTGCCCAACTGTACCTCAAACCTTGGAACCTGATTAAG |                          |                            | 302                            |
| Query             | 887    | GACCAGATCACTGATGTGCACITGGTGGAGAGACTGCAGGCCCTGTATACGATCCGGGTG |                          |                            | 946                            |
| Sbjct             | 303    | GACCAGATCGCTGATGTGCACITGGTGGAGAGACTGCAGGCCCTGTATATGATCCGGATG |                          |                            | 362                            |
| Query             | 947    | AAGGACTCCTTGATTGCGTTGACTGTGCCATGGAGAGTAGCAGAAACAGCAGCATGCTC  |                          |                            | 1006                           |
| Sbjct             | 363    | AAGGACTCCTTGATTGCGTTGACTGTGCCATGGAGAGTAGCAGAAACAGCAGCATGCTC  |                          |                            | 422                            |
| Query             | 1007   | ACCCTCCCACTTTCTCTTTTGGATGTGGACTCAAAGCCCTGAAGACTGGAGGACGCC    |                          |                            | 1066                           |
| Sbjct             | 423    | ACCCTCCCACTTTCTCTTTTGGATGTGGACTCAAAGCCCTGAAGACTGGAGGACGCC    |                          |                            | 482                            |
| Query             | 1067   | CTGCACTGCTTCTTCCAGCCCAGGGAGTTATCAAGCAAAGCAAGTGCTTCTGTGAGAAC  |                          |                            | 1126                           |
| Sbjct             | 483    | CTGCACTGCTTCTTCCAGCCCAGGGAGTTATCAAGCAAAGCAAAATGCTTCTGTGAGAAC |                          |                            | 542                            |
| Query             | 1127   | TGTGGGAAGAGACCCGTGGGAAACAGGTCCTGAAGCTGACCCATTGCCCCAGACCCTG   |                          |                            | 1186                           |
| Sbjct             | 543    | TGTGGGAAGAGACCCGTGGGAAACAGGTCCTGAAGCTGACCCATTGCCCCAGACCCTG   |                          |                            | 602                            |
| Query             | 1187   | ACAATCCACCTCATGCGATTCTCCATCAGGAATTCACAGACGAGAAAGATCTGCCACTCC |                          |                            | 1246                           |
| Sbjct             | 603    | ACAATCCACCTCATGCGATTCTCCATCAGGAATTCACAGACGAGAAAGATCTGCCACTCC |                          |                            | 662                            |
| Query             | 1247   | CTGTACTTCCCCAGAGCTTGGATTCAGCCAGATCCTTCCAATGAAGCGAGAGTCTTGT   |                          |                            | 1306                           |
| Sbjct             | 663    | CTGTACTTCCCCAGAGCTTGGATTCAGCCAGATCCTTCCAATGAAGCGAGAGTCTTGT   |                          |                            | 722                            |
| Query             | 1307   | GATGCTGAGGAGCAGTCTGGAGGGCAGTATGAGCTTTTGTGCTGATTGCGCACGTGGGA  |                          |                            | 1366                           |
| Sbjct             | 723    | GATGCTGAGGAGCAGTCTGGAGGGCAGTATGAGCTTTTGTGCTGATTGCGCACGTGGGA  |                          |                            | 782                            |
| Query             | 1367   | ATGGCAGACTCCGGTCATTACTGTGTCTACATCCGGAATGCTGTGGATGGAAAATGGTTC |                          |                            | 1426                           |
| Sbjct             | 783    | ATGGCAGACTCCGGTCATTACTGTGTCTACATCCGGAATGCTGTGGATGGAAAATGGTTC |                          |                            | 842                            |
| Query             | 1427   | TGCTTCAATGACTCCAATATTTGCTTGGTGTCTTGGGAAGACATCCAGTGTACCTACGGA |                          |                            | 1486                           |
| Sbjct             | 843    | TGCTTCAATGACTCCAATATTTGCTTGGTGTCTTGGGAAGACATCCAGTGTACCTACGGA |                          |                            | 902                            |
| Query             | 1487   | AATCCTAACTACCCTGGC                                           | 1505                     |                            |                                |
| Sbjct             | 903    | AATCCTAACTACCCTGGC                                           | 921                      |                            |                                |

Figure S3. **Alignment of USP18 and USP41.** The sequences of *USP18* and *USP41* were aligned using NCBI Blast. The resulting alignment highlights the extensive similarity of these sequences. The Sanger sequencing of *USP18* identified several SNPs that could be mapped to the *USP41* gene and which were therefore not regarded as possible pathogenic *USP18* variants. We classified *USP41* as a pseudogene because the data in the Ensembl database indicated an absence of UTRs.

Table S1. Exome sequencing data

| Data                                          | P03        | Mother     | P01        | P02        | Father     |
|-----------------------------------------------|------------|------------|------------|------------|------------|
| Raw data (bases)                              | 7548982198 | 6097723500 | 6870304618 | 5113423960 | 7913013872 |
| Raw data (Gb)                                 | 7.55       | 6.10       | 6.87       | 5.11       | 7.91       |
| Raw data (n)                                  | 74742398   | 60373500   | 68022818   | 50627960   | 78346672   |
| Duplicate reads (n)                           | 26999908   | 17033872   | 21416278   | 14531319   | 30411386   |
| Mapped reads (n)                              | 68345462   | 55487730   | 62369119   | 46790969   | 71743856   |
| Data mapped to target region (Gb)             |            |            |            |            |            |
| RefSeq (CDS)                                  |            |            |            |            |            |
| Data mapped to refseq Coding Segments (bases) | 3147011420 | 2528692389 | 2798328026 | 2126940432 | 3276055579 |
| Data mapped to refseq Coding Segments (Gb)    | 3.15       | 2.53       | 2.80       | 2.13       | 3.28       |
| Bases in refseq                               | 33327179   | 33327179   | 33327179   | 33327179   | 33327179   |
| Bases with 1X coverage                        | 32647651   | 32568203   | 32622555   | 32521253   | 32634218   |
| Bases with 10X coverage                       | 31088779   | 30802989   | 30852060   | 30052398   | 31281767   |
| Bases with 20X coverage                       | 29045082   | 28158446   | 28464365   | 26501230   | 29542937   |
| % with 1X coverage                            | 97.96%     | 97.72%     | 97.89%     | 97.58%     | 97.92%     |
| % with 10X coverage                           | 93.28%     | 92.43%     | 92.57%     | 90.17%     | 93.86%     |
| % with 20X coverage                           | 87.15%     | 84.49%     | 85.41%     | 79.52%     | 88.65%     |
| Mean coverage                                 | 94.43      | 75.87      | 83.97      | 63.82      | 98.30      |

Table S2. Filtering steps

| Filtering of variants in the exome sequencing data for family A |                |
|-----------------------------------------------------------------|----------------|
| Total variants in each family member                            | ~100,000       |
| Removal of low-quality and non-coding variants                  | ~20,000        |
| Application of homozygous recessive model                       | 78             |
| Variants in linkage region                                      | 14             |
| Removal of common variants (<0.01)                              | 1 <sup>a</sup> |

<sup>a</sup>No functional effect of this variant could be demonstrated

Table S3. Primers used for the Sanger sequencing of missing exons

| Sanger sequencing primers for exons with low coverage in the linked area |                                        |           |                          |                        |
|--------------------------------------------------------------------------|----------------------------------------|-----------|--------------------------|------------------------|
| Gene                                                                     | Exon                                   | OMIM gene | Forward primer           | Reverse primer         |
| <i>POTEH</i>                                                             | 1,2,3,4,5,6,7,8,9,10,11                | yes       |                          |                        |
| <i>OR11H1</i>                                                            | 1                                      | no        |                          |                        |
| <i>CCT8L2</i>                                                            | 1                                      | no        |                          |                        |
| <i>TPTEP1</i>                                                            | 2,3,4,5,6,7,8,9                        | no        |                          |                        |
| <i>ANKRD62P1-PARP4P3</i>                                                 | 1,3,4,5,6,7,9                          | no        |                          |                        |
| <i>XKR3</i>                                                              | 1                                      | yes       |                          |                        |
| <i>CECR7</i>                                                             | 1,4                                    | yes       |                          |                        |
| <i>CECR3</i>                                                             | 1,2,3                                  | no        |                          |                        |
| <i>MICAL3</i>                                                            | 19                                     | yes       |                          |                        |
| <i>FLJ41941</i>                                                          | 1,2                                    | no        |                          |                        |
| <i>USP18</i>                                                             | 5,7,8,9,10,11                          | yes       |                          |                        |
| <i>GGT3P</i>                                                             | whole gene                             | no        |                          |                        |
| <i>DGCR5</i>                                                             | 3                                      | no        |                          |                        |
| <i>(NT_002733)</i>                                                       | 4                                      |           |                          |                        |
| <i>DGCR9</i>                                                             | 1                                      | no        |                          |                        |
| <i>DGCR10</i>                                                            | 1                                      | no        |                          |                        |
| <i>DGCR14</i>                                                            | 1                                      | yes       | ATAGCATCTCCCCGCCACC      | CCACAGACGTCTTCTCTGCC   |
| <i>LOC150185</i>                                                         | 1                                      | no        |                          |                        |
| <i>TBX1 (NM_080646)</i>                                                  | 3                                      | yes       | CCCCGGGTCATGATCTCCG      | GGTGTTAGGAGGGGAGCGCC   |
| <i>RANBP1</i>                                                            | 1                                      | yes       | GAGTGTCCGCCTCTGAGCC      | CAAACGCCCAACTCCGC      |
| <i>LOC284865</i>                                                         | 1,2,3,4                                | no        |                          |                        |
| <i>LOC150197</i>                                                         | 1                                      | no        |                          |                        |
| <i>LOC729444</i>                                                         | 1,2,3,4,5,6,7,8,9,10,11,12             | no        |                          |                        |
| <i>TMEM191B</i>                                                          | 1,2,3,4,5,6,8,9                        | no        |                          |                        |
| <i>PI4KAP1</i>                                                           | 1,3,4,6,8,9,10,11,12,13,14,15          | no        |                          |                        |
| <i>RIMBP3</i>                                                            | 1                                      | yes       |                          |                        |
| <i>POM121L4P</i>                                                         | 1                                      | no        |                          |                        |
| <i>TMEM191A</i>                                                          | 1,3,4,5,8                              | no        |                          |                        |
| <i>PI4KA (NM_002650)</i>                                                 | 33                                     | yes       | CGGTTGAACAGAAGGCAGCC     | AAGACGCTGTGGTGGTGGGG   |
|                                                                          | 34                                     |           | GCCAGTCAGCCAGAACCCC      | GCCCCGAGCCAGTTAGAGC    |
|                                                                          | 35                                     |           | TGTGTACAGTGTGTATGGGGCG   | GGGGTTTGGGGCGATGGAGC   |
|                                                                          | 36                                     |           | -                        | -                      |
|                                                                          | 45                                     |           | -                        | -                      |
|                                                                          | 46, 47                                 |           | TGGAACTGACTCTGGCTCACC    | AGGGATCTGACTGAGTGAGGGC |
|                                                                          | 48                                     |           | TGGGGTTTTGAAGAAGTGATCCCC | AGATTGGACTCTGGCGGGCC   |
|                                                                          | 49                                     |           | -                        | -                      |
|                                                                          | 50                                     |           | -                        | -                      |
|                                                                          | 51                                     |           | GCCCACTTCCACAGAGAGCCC    | GGCCAGGCACCTCTACAGC    |
|                                                                          | 52                                     |           | GCTCCTTCTCCACTTCTCTCCC   | GGGCAGGATCGTGGGAAGG    |
|                                                                          | 54                                     |           | -                        | -                      |
|                                                                          | 55                                     |           | CACGGATGGAAGCGGTTTGGC    | TTGTCGCTGCAGTCCATGGC   |
| <i>TUBA3FP</i>                                                           | 1,2,3                                  | no        |                          |                        |
| <i>LOC400891</i>                                                         | ex3,4,7,9,10,11                        | no        |                          |                        |
| <i>BRCP2</i>                                                             | ex1,2,3,4,6                            | yes       |                          |                        |
| <i>POM121L8P</i>                                                         | ex1,2,3,4,5,6,7                        | no        |                          |                        |
| <i>RIMBP3C</i>                                                           | ex1                                    | yes       |                          |                        |
| <i>TMEM191C</i>                                                          | ex1,2,3,4,5,6,7,8,9                    | no        |                          |                        |
| <i>PI4KAP2</i>                                                           | ex1,2,3,4,5,6,7,9,10,11,12,13,14,15,17 | no        |                          |                        |
| <i>RIMBP3B</i>                                                           | ex1                                    | yes       | -                        | -                      |
| <i>UBE2L3</i>                                                            | ex3                                    | yes       | AGTTTTGTTCCCGATTAGCTGCC  | CGGTGGCACGTGCAATTTCC   |
| <i>TOP3B</i>                                                             | ex18                                   | yes       | TGTGGCCAGTGACATGAGG      | CAGGGGACGGAGAAGTGTGG   |
|                                                                          | ex18 internal primer 1                 |           | GGGACGAGGGATCCAGGAGC     | CGACCTGCCTTCTCCCTGG    |
|                                                                          | ex18 internal primer 2                 |           | GGGCTGCGTCTTTTGTGACC     | ATGCAGGCTGAAGGGAGAGC   |
| <i>LOC96610</i>                                                          | ex1,2,3,4,5,6,7,8,10                   | no        |                          |                        |
| <i>LOC648691</i>                                                         | ex3                                    | no        |                          |                        |
| <i>POM121L1P</i>                                                         | ex1,2,3,4,5,6,8,9,10                   | no        |                          |                        |
| <i>GGTLC2</i>                                                            | 1                                      | yes       | ACCTGTGTCCCCTCCCCACC     | CACCTGACCTTGCTGGCCC    |
|                                                                          | 2                                      |           | CTGGTGGGAAAGGGCCAGG      | TGCTTCCCTGTGGCCGATGG   |
|                                                                          | 3                                      |           | TTGGCTCAAAGTCCGCTCC      | ACGGCCAGGGAGAAAAGGGG   |
|                                                                          | 4                                      |           | GCCGCTCTCGTCAATGTGCC     | ACTCTGTGATGATCCAGGCTCC |

Table S3. Primers used for the Sanger sequencing of missing exons (*Continued*)

| Sanger sequencing primers for exons with low coverage in the linked area |       |           |                      |                       |
|--------------------------------------------------------------------------|-------|-----------|----------------------|-----------------------|
| Gene                                                                     | Exon  | OMIM gene | Forward primer       | Reverse primer        |
| <i>BCR (NM_004327)</i>                                                   | 5     |           | GGCCCAACCTGCTCTTCC   | AGTGGGAGACAGGGCAGGG   |
|                                                                          | 17    | yes       |                      |                       |
|                                                                          | 18    |           |                      |                       |
|                                                                          | 19    |           |                      |                       |
|                                                                          | 20    |           | CGCACAGTGGTCAGCATGGC | GCTCGTTCTGGTCCCCTGC   |
| <i>HIC2</i>                                                              | 22    |           | AACTCCAGCACAGCCCAGCC | AGAAGATGGGCAGGACTGGGG |
|                                                                          | ex2,3 | yes       |                      |                       |

Table S4. Primers used for the genomic Sanger sequencing (intron and exon primers), qRT-PCR, RT-PCR and 3' RACE of *USP18*

| Genomic <i>USP18</i> primers              |                            |
|-------------------------------------------|----------------------------|
| <b>USP18ex2F</b>                          | TCAGTCTCCCCAACATTTATCTCC   |
| USP18ex2R                                 | CAGGCACAGGAAAGCATGAGC      |
| USP18ex3F                                 | ATGTTGGCCAGGCTGGTCTC       |
| USP18ex3R                                 | GGGAGGCAGAACTTGCAGTG       |
| USP18ex4F                                 | AACCCAGCATGTGCCTCTGC       |
| USP18ex4R                                 | CCTGCAGTTCCTGACTGTGG       |
| USP18ex4intF                              | TTCTTGTGTGGCAGGATCAGC      |
| USP18ex4intR                              | CGGCTGTCTGCATCTTCTCC       |
| USP18ex5F                                 | CCTTGACGTGGGGTGGAGGG       |
| USP18ex5R                                 | ACAGGGTTTCACTGTGTAGCCAGG   |
| USP18ex6F                                 | TTGTGAGGAGCTTCTGTCTCTTGG   |
| USP18ex6R                                 | TGAGAGTCCCACCAGCAAGC       |
| USP18ex7F                                 | GCTGCCATGCTTCCGGTT         |
| USP18ex7R                                 | CCCCATAGGCACGAGTTCCA       |
| USP18ex8F                                 | AACTCCGTGATGTGCCCCCG       |
| USP18ex8R                                 | GGGTGAAGGAAGGAAACAGAAAGG   |
| USP18ex9F                                 | CAGAGTCGGCCTAGTGTGGG       |
| USP18ex9R                                 | CTCAGAGACCCACGCAGCCC       |
| USP18ex10F                                | TCCAGGCTCTTGGGAGTTGC       |
| USP18ex10R                                | AATCCATGGCGTTTCATGC        |
| USP18ex11F                                | CTGACGCTTGTCTGTACAGC       |
| USP18ex11R                                | GGTCTGCTGGTGAAGCATCC       |
| <b>qRT-PCR <i>USP18</i> primers</b>       |                            |
| USP18_qrt_e4-6F                           | AACGTGCCCTTGTTTGTCC        |
| USP18_qrt_e4-6R                           | GCAGTCTCTCCACCAAGTGC       |
| <b>Intron primers</b>                     |                            |
| USP18_intr9F                              | TGAACTGTCTCGTGCCTGTC       |
| USP18_intr9R                              | AGTGGGGAGTTGGCCTAGAT       |
| USP18_intr10_1F                           | GATGAGCTCACATAGGGTCTTGG    |
| USP18_intr10_1R                           | GAGGAGGAGCCAAGTGTAGTAGCC   |
| USP18_intr10_2F                           | GATTCGTAGGGGCTTCTGTATGG    |
| USP18_intr10_2R                           | TGAGCTATGATCACACCACAGTGC   |
| USP18_intr10_3F                           | ACCACACCTGGCCTTCTTATATGC   |
| USP18_intr10_3R                           | AGAGCTTGCAATGAGCTGAGATCC   |
| USP18_intr10_4F                           | GCTCTGCCTCGTGGGTTTCAT      |
| USP18_intr10_4R                           | TGCAACAGACACCCGACAGA       |
| USP18_intr10_5F                           | CTGCCTCGTGGGTTTCATGC       |
| USP18_intr10_5R                           | TCCCACCTGCCACTGCTCTCC      |
| USP18_intr10_5i1F                         | CACCCAATCTTTGTCACTTTGTGG   |
| USP18_intr10_5i1R                         | GGCACAATAATAGCTCACACAGC    |
| USP18_intr10_5i2F                         | GGAGGATCACTTCAAGCCAGGA     |
| USP18_intr10_5i2R                         | TGCATTATGTTTTGTTTGGTTTTTGG |
| USP18_intr10_5i3F                         | CTGGGAGGCGGAGGTTGC         |
| USP18_intr10_5i3R                         | CGTGACAGGACAAGCGTCAGC      |
| USP18_intr10_5i4F                         | GGAGGGGTGAAAGGCCAACT       |
| USP18_intr10_5i4R                         | CCTGAGGGGCTCATGGTTA        |
| <b>Extra genomic primers <i>USP18</i></b> |                            |
| USP18_exon10uF                            | GTTGCGGTGAGCTGAGATCG       |
| USP18_exon10uR                            | AAGAGGCACAAGGGCACAGG       |
| USP18_9bF                                 | CCTGGAGGGTGCCCACTG         |
| USP18_9bR                                 | GCAGAGCATGAGCCTAGAGCA      |
| <b>RT-PCR primers <i>USP18</i></b>        |                            |
| USP18_cDNA_F                              | GTCCCGACGTGGAACCTCAGC      |
| USP18_cDNA_R                              | TCCCCTGCCACTGCTCTCC        |
| USP18_cDNA_int1R                          | GCAGCAGAAGCATCTGAAAGG      |
| USP18_cDNA_int2F                          | GACAGACCTGCTGCCTTAACTCC    |
| USP18_cDNA_int2R                          | TGCTTTCAGGGGCTTTGAGTCC     |
| USP18_cDNA_int3F                          | CAGAAACAGCAGCATGCTCAC      |

Table S4. Primers used for the genomic Sanger sequencing (intron and exon primers), qRT-PCR, RT-PCR and 3' RACE of *USP18* (Continued)

| Genomic <i>USP18</i> primers |                          |
|------------------------------|--------------------------|
| USP18ex2F                    | TCAGTCTCCCAAACATTTATCTCC |
| USP18_cDNA_int3R             | TGACCGGAGTCTGCCATTCC     |
| USP18_cDNA_int4F             | GCGAGAGTCTTGTGATGCTGAGG  |
| USP18_rt_stop1F              | CGCCCTGCACTGCTTCTTCC     |
| USP18_rt_stop_3R             | GCTTGATAACTCCCTGGGCTG    |



Table S5. Haplotypes of chromosome 22q11 in family A and B using Illumina cyto-snp-850 kb arrays

| Name        | Chr | Position | Fam A p1 | Fam B p4 |
|-------------|-----|----------|----------|----------|
| rs450718    | 22  | 18493980 | BB       | AA       |
| rs452579    | 22  | 18495470 | BB       | AB       |
| rs390495    | 22  | 18504801 | AA       | AB       |
| rs2034299   | 22  | 18505121 | AA       | AA       |
| rs1867357   | 22  | 18507030 | BB       | BB       |
| rs8139236   | 22  | 18512496 | AA       | AB       |
| rs1076115   | 22  | 18518651 | AA       | AB       |
| rs4819661   | 22  | 18518829 | BB       | BB       |
| rs975826    | 22  | 18520582 | BB       | BB       |
| rs450703    | 22  | 18522098 | BB       | AB       |
| rs462904    | 22  | 18526789 | AA       | AA       |
| rs466755    | 22  | 18530984 | AA       | AA       |
| rs455758    | 22  | 18533335 | BB       | BB       |
| rs458888    | 22  | 18533434 | BB       | AB       |
| rs458480    | 22  | 18539370 | AA       | AB       |
| rs460036    | 22  | 18539553 | BB       | BB       |
| rs7288409   | 22  | 18542311 | AA       | AA       |
| rs5992985   | 22  | 18545634 | BB       | BB       |
| rs5992990   | 22  | 18547507 | AA       | AA       |
| rs5992165   | 22  | 18549174 | BB       | BB       |
| rs17742344  | 22  | 18549641 | BB       | BB       |
| rs10483096  | 22  | 18551780 | AA       | AA       |
| rs17809705  | 22  | 18552662 | BB       | BB       |
| rs4819666   | 22  | 18555134 | AA       | AA       |
| rs8139802   | 22  | 18558511 | BB       | BB       |
| rs462055    | 22  | 18560570 | BB       | BB       |
| rs12157958  | 22  | 18560611 | AA       | AA       |
| kgp15096395 | 22  | 18560780 | AA       | AA       |
| kgp10315947 | 22  | 18560825 | AA       | AA       |
| kgp15024021 | 22  | 18562595 | AA       | AA       |
| kgp12323098 | 22  | 18563052 | BB       | BB       |
| rs361780    | 22  | 18565346 | BB       | BB       |
| kgp14988429 | 22  | 18566702 | BB       | BB       |
| rs17207360  | 22  | 18566917 | BB       | BB       |
| kgp1211229  | 22  | 18567005 | AA       | AA       |
| exm1584146  | 22  | 18567938 | BB       | BB       |
| rs385130    | 22  | 18570175 | BB       | BB       |
| kgp15048898 | 22  | 18570851 | BB       | NC       |
| kgp1362953  | 22  | 18571008 | AA       | AA       |
| kgp15050974 | 22  | 18571241 | BB       | BB       |
| kgp10333452 | 22  | 18571595 | AA       | AA       |
| kgp15077230 | 22  | 18571785 | BB       | BB       |
| rs361807    | 22  | 18571828 | BB       | BB       |
| kgp12284670 | 22  | 18572035 | BB       | BB       |
| kgp15012795 | 22  | 18572274 | BB       | BB       |
| kgp15085445 | 22  | 18572370 | AA       | AA       |
| rs5992169   | 22  | 18572431 | BB       | BB       |
| rs467998    | 22  | 18582650 | AA       | AA       |
| rs467504    | 22  | 18583267 | BB       | BB       |
| rs3827281   | 22  | 18584433 | BB       | BB       |
| rs17809734  | 22  | 18584588 | BB       | BB       |
| rs9617659   | 22  | 18586756 | AA       | AA       |
| rs5992999   | 22  | 18590899 | BB       | BB       |
| rs361893    | 22  | 18594931 | AA       | AA       |
| rs9617661   | 22  | 18595352 | AA       | AB       |
| rs362043    | 22  | 18596449 | BB       | BB       |
| kgp1383642  | 22  | 18597404 | BB       | BB       |
| rs464901    | 22  | 18597502 | AA       | AA       |
| kgp15088499 | 22  | 18598859 | BB       | BB       |
| rs361540    | 22  | 18601415 | AA       | AA       |
| kgp10583533 | 22  | 18602653 | BB       | BB       |
| kgp15048986 | 22  | 18606946 | BB       | BB       |
| rs9618203   | 22  | 18607872 | BB       | BB       |

Table S5. Haplotypes of chromosome 22q11 in family A and B using Illumina cyto-snp-850 kb arrays (*Continued*)

| Name             | Chr       | Position        | Fam A p1 | Fam B p4 |
|------------------|-----------|-----------------|----------|----------|
| rs362133         | 22        | 18608627        | AA       | AA       |
| rs2234329        | 22        | 18609065        | BB       | BB       |
| rs2234331        | 22        | 18609128        | BB       | BB       |
| rs361776         | 22        | 18609854        | BB       | BB       |
| rs362249         | 22        | 18610110        | AA       | AA       |
| rs10427839       | 22        | 18610146        | BB       | BB       |
| rs7286465        | 22        | 18610798        | AA       | AA       |
| kgp1376668       | 22        | 18611223        | AA       | AA       |
| kgp10743826      | 22        | 18611596        | BB       | BB       |
| rs8140197        | 22        | 18613045        | BB       | BB       |
| kgp12096200      | 22        | 18614445        | BB       | BB       |
| rs2540620        | 22        | 18614874        | AA       | AB       |
| rs5747490        | 22        | 18624958        | AA       | AA       |
| rs5993010        | 22        | 18626900        | AA       | AA       |
| rs361534         | 22        | 18628715        | BB       | BB       |
| rs5747494        | 22        | 18629028        | BB       | BB       |
| rs7291885        | 22        | 18629153        | BB       | BB       |
| rs9618216        | 22        | 18631365        | BB       | AB       |
| <b>rs5993013</b> | <b>22</b> | <b>18633446</b> | BB       | BB       |
| <b>rs5992185</b> | <b>22</b> | <b>18633978</b> | AA       | AB       |
| <b>rs2252257</b> | <b>22</b> | <b>18640300</b> | BB       | AB       |
| rs3859817        | 22        | 18844632        | BB       | BB       |
| rs2870978        | 22        | 18886915        | BB       | AB       |
| rs2870982        | 22        | 18889490        | AA       | AA       |
| <i>rs454534</i>  | <i>22</i> | <i>18891398</i> | AA       | BB       |

Analysis of 86 SNPs on Illumina cyto-snp-850K-B arrays covering 400-kb area across *USP18* (chr 22: 18483880-18891398, *USP18* spans bp 18632666-18660164) in P1 from family A and P4 from family B, shows a shared allele between the two families. The SNPs in *USP18* are shown in bold, the SNPs adjacent to the haplobloc are shown in italics.

## Clinical description of family A

During the first pregnancy of the mother, a routine ultrasound scan at 22 wk of gestation (GW) demonstrated microcephaly, enlarged ventricles, and diffuse, irregular hyperechogenicity in the brain parenchyma (P1). Prenatal MRI at 22 5/7 GW confirmed these findings, in addition to periventricular and (sub)cortical calcifications and subcortical infarcts. The pregnancy was terminated at 23 5/7 GW. Postmortem pathology analysis showed the fetus to be female, with severe microcephaly and a brain weight  $<<p10$  (35 g), hydrocephalus, subcortical infarcts, hemorrhages of the germinal matrix, choroid plexus and dentate nucleus, and calcifications located in the basal ganglia and cortical layers. In addition, the cortex was thin, equivalent in thickness to that of a fetus at 16 wk of gestation.

The second and third pregnancies were initially uneventful. However, at the thirtieth and 32thirty second weeks of gestation, respectively, a decrease in fetal movement was observed, with CTG decelerations, requiring emergency cesarean section in both pregnancies. Immediately after birth, the second child (P2), a boy, required intubation and mechanical ventilation because of respiratory failure. Brain imaging on day 1 showed massive hemorrhages, mostly in the basal ganglia, brain stem, and cerebellum. He developed myoclonic seizures, progressive hypotonia, and lethargy. The EEG showed a slow trace without epileptic activity. The third child (P3), also a boy, was initially able to breathe spontaneously, but he also required intubation and ventilation by the end of the first day. Brain imaging showed initial white matter and cortical abnormalities. Thalamic hemorrhage was subsequently noted. He became increasingly lethargic and the EEG showed a burst-suppression pattern. Liver function defects (high levels of ammonia, SGOT, and SGPT activity, low levels of albumin and clotting factors) were observed, with ascites, but were more severe in P3, and thrombocytopenia (between  $14\text{--}62 \times 10^9/l$ , normal  $144\text{--}449$ ), with diffuse petechiae was observed in P2. Both had variable lactic acidosis. Ophthalmological abnormalities were observed only in P3, in the form of thin retinal vessels and retinal hemorrhage. Head circumference was normal in both boys. They both developed severe bradycardia and died at the ages of 7 and 17 d, respectively.

A differential diagnostic of AGS was considered for P1, leading to an analysis of the sequences of the TREX1, RNASEH2B (exons 2, 6, and 7), and RNASEH2C (exons 2 and 3) genes. No abnormalities of these genes were observed. Extensive screening was performed for mitochondrial disorders (POLG, TWINKLE, TP, TK2, ANT1, SCO2, SUCLA2, RRMB2, MPV17, DGK, and dGUOK), but normal results were obtained for both patients. In P2, Sanger sequencing of the COL4A1 and COL4A2 genes yielded normal results. Extensive metabolic screening and muscle biopsy results were normal for P2 and P3. In all patients, negative results were obtained for screening for TORCH and parvo B19 infections.
